# Supplementary material for: Retrospective Analysis of the SARS-CoV-2 Infection Profile in COVID-19 Positive Patients in Vitoria da Conquista, Northeast Brazil
Source: MDPI journal article supplement (doi:10.3390/v14112424), 2022-10-31
Supplement: s1 [file s1]

## Supplementary material

**Table S1.** Characteristics of patients and sequenced samples

| Identification | Sex | Age | Ct <sup>a</sup> | Disease severity | Neighborhood             | Collection <sup>b</sup> | Reads  | Coverage | Depth of Coverage | Identity NT | Identity AA | Lineages  |
|----------------|-----|-----|-----------------|------------------|--------------------------|-------------------------|--------|----------|-------------------|-------------|-------------|-----------|
| VC5            | M   | 44  | 20,81           | Asymptomatic     | Felícia                  | 5/23/2020               | 210629 | 92.5     | 4402.5            | 99.9        | 99.7        | B.1       |
| VC7            | M   | 81  | 18,15           | Moderate/severe  | Cruzeiro                 | 5/22/2020               | 315998 | 96.6     | 6637.7            | 100         | 100         | B.1       |
| VC11           | M   | 52  | 21,1            | Asymptomatic     | Campinhos                | 10/5/2020               | 290884 | 99.5     | 6102.7            | 99.9        | 99.9        | B.1.1.33  |
| VC12           | M   | 55  | 18,4            | Mild             | Ibirapuera               | 8/19/2020               | 336426 | 99       | 6465.4            | 100         | 99.9        | B.1       |
| VC21           | F   | 61  | 23,69           | Moderate/severe  | Urbis V                  | 7/23/2020               | 245351 | 96.5     | 5008.7            | 99.8        | 99.9        | B.1       |
| VC34           | M   | 50  | 20,22           | Mild             | Urbis VI                 | 8/13/2020               | 265303 | 95.7     | 7779              | 99.9        | 99.9        | B.1       |
| VC38           | M   | 48  | 24,05           | Moderate/severe  | Boa Vista                | 7/3/2020                | 142551 | 99.7     | 2701.6            | 99.9        | 99.9        | B.1.1.28  |
| VC44           | F   | 45  | 18.75           | Moderate/severe  | Alto da Boa Vista        | 8/20/2020               | 263139 | 96.3     | 5428.4            | 99.9        | 99.9        | B.1       |
| VC46           | F   | 47  | 20,99           | Moderate/severe  | Morada dos Pássaros I    | 8/25/2020               | 180668 | 92.4     | 5379.1            | 99.8        | 99.6        | B.1       |
| VC49           | M   | 42  | 24,98           | Moderate/severe  | Urbis III                | 8/25/2020               | 306933 | 92.1     | 6507.3            | 100         | 99.9        | B.1       |
| VC50           | M   | 33  | 21,83           | Moderate/severe  | Urbis V                  | 8/26/2020               | 293570 | 94.8     | 10544.9           | 99.9        | 99.9        | B.1       |
| VC51           | M   | 63  | 19,02           | Mild             | Cidade Maravilhosa       | 8/26/2020               | 198407 | 92.9     | 4128.9            | 99.9        | 99.8        | B.1       |
| VC52           | M   | 54  | 18,97           | Moderate/severe  | Morada dos Pássaros III  | 8/27/2020               | 199091 | 84.6     | 4455.7            | 100         | 99.8        | B.1       |
| VC53           | F   | 40  | 23,32           | Moderate/severe  | Santa Cecília            | 8/27/2020               | 310881 | 94.7     | 6342.7            | 100         | 99.9        | B.1       |
| VC54           | M   | 49  | 24,12           | Moderate/severe  | Kadisa                   | 8/27/2020               | 202273 | 92.1     | 4166.9            | 99.9        | 99.8        | B.1       |
| VC56           | F   | 48  | 21,58           | Moderate/severe  | Zabele                   | 8/27/2020               | 271181 | 90.5     | 5780.5            | 99.9        | 99.8        | B.1       |
| VC60           | F   | 86  | 22,71           | Asymptomatic     | Patagônia                | 10/21/2020              | 246885 | 91       | 5217.9            | 99.9        | 99.8        | B.1       |
| VC61           | M   | 86  | 25,5            | Moderate/severe  | Bairro Brasil            | 10/21/2020              | 223013 | 94       | 6439.9            | 99.9        | 99.9        | B.1       |
| VC66           | M   | 35  | 19,89           | Moderate/severe  | Guarani                  | 11/2/2020               | 173960 | 99.4     | 3305.8            | 99.9        | 99.9        | N.9       |
| VC68           | F   | 30  | 21,46           | Moderate/severe  | Primavera                | 11/03/2020              | 176536 | 94       | 3742.1            | 100         | 99.9        | B.1.233   |
| VC81           | F   | 50  | 25,6            | Asymptomatic     | Bairro Brasil            | 8/20/2020               | 185269 | 99.5     | 3849.3            | 99.9        | 99.9        | B.1.1.33  |
| VC90           | M   | 65  | 19,08           | Mild             | Recreio                  | 11/6/2020               | 320774 | 97.3     | 6604.9            | 100         | 99.9        | B.1       |
| VC92           | M   | 30  | 23.46           | Asymptomatic     | Felícia                  | 7/21/2021               | 198125 | 99.5     | 3855.3            | 99.8        | 99.8        | P.1       |
| VC96           | M   | 32  | 25.5            | Recovered        | Boa Vista                | 7/21/2021               | 165078 | 99.4     | 3587.9            | 99.8        | 99.8        | P.1       |
| VC6            | F   | 62  | 15.13           | Moderate/severe  | Nossa Senhora de Lourdes | 5/18/2020               | 300591 | 98.2     | 5672.7            | 99.9        | 99.8        | B.1.1.161 |
| VC14           | M   | 48  | 17,77           | Mild             | Jurema                   | 7/2/2020                | 413780 | 98.4     | 8805.6            | 99.9        | 99.9        | B.1       |
| VC17           | M   | 68  | 23,09           | Moderate/severe  | Vila Serrana II          | 7/3/2020                | 212703 | 97.1     | 5918.6            | 99.9        | 99.8        | B.1       |
| VC18           | F   | 6   | 22,13           | Moderate/severe  | Vila Serrana III         | 7/5/2020                | 392051 | 99.4     | 6658.8            | 99.9        | 99.8        | B.1.1     |
| VC26           | M   | 44  | 17,2            | Death            | Jardim Sudoeste          | 7/29/2020               | 360095 | 99.3     | 7679.1            | 99.9        | 99.8        | B.1       |
| VC28           | M   | 29  | 16,74           | Moderate/severe  | Jardim Guanabara         | 7/30/2020               | 284781 | 99.5     | 5993.6            | 100         | 99.9        | B.1.1.28  |

|      |   |    |       |                     |                                |            |        |      |         |      |      |          |
|------|---|----|-------|---------------------|--------------------------------|------------|--------|------|---------|------|------|----------|
| VC29 | M | 71 | 19,21 | Moderate<br>/severe | Santa Cecilia                  | 8/6/2020   | 404282 | 99.7 | 11050.8 | 99.9 | 100  | B.1      |
| VC32 | F | 45 | 20,11 | Moderate<br>/severe | Bairro Brasil                  | 8/08/2020  | 234122 | 99.7 | 4782.6  | 99.9 | 99.8 | B.1      |
| VC33 | M | 77 | 24,2  | Mild                | Cruzeiro                       | 8/12/2020  | 263720 | 99.4 | 5170.5  | 99.9 | 99.9 | B.1      |
| VC35 | M | 40 | 21,92 | Moderate<br>/severe | Recreio                        | 8/14/2020  | 308326 | 99.7 | 6703.6  | 99.9 | 99.9 | B.1.1.33 |
| VC39 | M | 50 | 22,63 | Moderate<br>/severe | Conveima I                     | 8/14/2020  | 297037 | 99.4 | 6263.4  | 99.9 | 99.9 | B.1      |
| VC40 | F | 61 | 24,36 | Moderate<br>/severe | Nossa<br>Senhora<br>Aparecida  | 8/20/2020  | 123639 | 99.4 | 2473.8  | 100  | 100  | B.1      |
| VC42 | M | 75 | 22,45 | Moderate<br>/severe | Felícia                        | 8/18/2020  | 268623 | 99.5 | 5563.9  | 99.9 | 99.9 | B.1      |
| VC45 | F | 42 | 24,77 | Moderate<br>/severe | Ayrton Sena                    | 8/21/2020  | 177515 | 99.6 | 3600.6  | 99.9 | 99.9 | B.1.1.28 |
| VC58 | M | 15 | 24,23 | Moderate<br>/severe | Boa Vista                      | 10/21/2020 | 141679 | 99.7 | 2935.6  | 99.9 | 99.9 | N.3      |
| VC62 | M | 41 | 20,72 | Moderate<br>/severe | Espírito<br>Santo              | 10/21/2020 | 106549 | 99.4 | 2390    | 99.9 | 99.9 | B.1.1.28 |
| VC64 | F | 64 | 22,08 | Moderate<br>/severe | Vila Serrana I                 | 10/21/2020 | 95620  | 99.1 | 2143    | 99.9 | 99.9 | B.1.1.33 |
| VC67 | M | 34 | 22,86 | Moderate<br>/severe | Primavera                      | 11/3/2020  | 215105 | 99.5 | 4575.5  | 99.9 | 99.9 | N.3      |
| VC70 | M | 58 | 21,27 | Moderate<br>/severe | Alto Maron                     | 11/4/2020  | 211953 | 99.4 | 4240.8  | 99.9 | 99.9 | B.1.1.28 |
| VC71 | M | 86 | 23,65 | Moderate<br>/severe | Bairro Brasil                  | 11/15/2020 | 299318 | 99.4 | 5950.1  | 99.9 | 99.9 | B.1.1.28 |
| VC77 | F | 50 | 24,14 | Moderate<br>/severe | Patagônia                      | 7/16/2020  | 199489 | 99.5 | 4546.8  | 100  | 99.9 | B.1      |
| VC79 | M | 42 | 20,88 | Mild                | Morada dos<br>Pássaros III     | 7/3/2020   | 208639 | 99.4 | 4268.1  | 99.7 | 99.6 | B.1      |
| VC94 | F | 13 | 19,0  | Recovere<br>d       | Nossa<br>Senhora de<br>Lourdes | 7/22/2021  | 260402 | 99.5 | 5103.9  | 99.8 | 99.8 | P.1      |
| VC98 | M | 69 | 19,58 | Mild                | Centro                         | 7/21/2021  | 243410 | 99.5 | 4434.4  | 99.8 | 99.8 | P.1      |
| VC1  | F | 74 | 25,68 | Moderate<br>/severe | Recreio                        | 11/11/2020 | 209933 | 99.5 | 3626.7  | 99.9 | 99.9 | B.1.1.28 |
| VC4  | F | 52 | 25,13 | Mild                | Recreio                        | 10/20/2020 | 246220 | 99.5 | 4361.3  | 99.9 | 99.9 | N.3      |
| VC8  | F | 49 | 24,34 | Mild                | Vila Serrana<br>II             | 9/29/2020  | 219811 | 94.1 | 4375.9  | 99.8 | 99.6 | B.1      |
| VC9  | F | 43 | 18,97 | Mild                | Centro                         | 8/5/2020   | 194932 | 91.1 | 3797.8  | 99.9 | 99.7 | B.1      |
| VC10 | F | 42 | 24,32 | Asympto<br>matic    | Nossa<br>Senhora<br>Aparecida  | 8/26/2020  | 179662 | 95.2 | 3318    | 99.9 | 99.8 | B.1.1    |
| VC19 | F | 34 | 22,91 | Asympto<br>matic    | Alegria                        | 7/9/2020   | 279529 | 99.5 | 4906    | 99.9 | 99.9 | B.1.1.28 |
| VC20 | M | 27 | 22,2  | Moderate<br>/severe | Primavera                      | 7/12/2020  | 220287 | 99.7 | 3800.1  | 99.9 | 99.9 | B.1.1.33 |
| VC22 | F | 34 | 24,92 | Moderate<br>/severe | Sumaré                         | 7/23/2020  | 185269 | 99.7 | 3431.3  | 99.9 | 100  | B.1.1.28 |
| VC36 | M | 55 | 24,66 | Moderate<br>/severe | Alto Maron                     | 8/17/2020  | 220143 | 91   | 4304    | 99.9 | 99.7 | B.1      |
| VC37 | M | 0  | 26,15 | Asympto<br>matic    | Cidade<br>Maravilhosa          | 7/7/2020   | 262056 | 99.8 | 4845.2  | 99.9 | 100  | B.1.1.33 |
| VC41 | M | 48 | 20,18 | Moderate<br>/severe | Miro Cairo                     | 8/17/2020  | 249448 | 99.7 | 4600.7  | 99.9 | 99.9 | B.1.1    |
| VC43 | M | 57 | 21,68 | Moderate<br>/severe | Recanto dos<br>Pássaros        | 8/20/2020  | 139124 | 91.3 | 2650.6  | 99.9 | 99.8 | B.1      |
| VC47 | F | 54 | 9,0   | Moderate<br>/severe | Candeias                       | 7/16/2020  | 243308 | 99.5 | 4520.8  | 99.9 | 99.9 | B.1.1.28 |
| VC48 | F | 79 | 23,49 | Moderate<br>/severe | São Vicente                    | 8/26/2020  | 29191  | 94.7 | 526.6   | 99.9 | 99.7 | B.1.1    |
| VC57 | F | 27 | 25,97 | Mild                | Morada dos<br>Pássaros III     | 10/22/2020 | 193380 | 90.7 | 3694.8  | 99.8 | 99.7 | B.1      |
| VC63 | M | 20 | 19,18 | Moderate<br>/severe | Recreio                        | 10/21/2020 | 166456 | 90   | 3254    | 99.9 | 99.8 | B.1      |

|      |   |    |       |                     |               |            |        |      |        |      |      |           |
|------|---|----|-------|---------------------|---------------|------------|--------|------|--------|------|------|-----------|
| VC65 | M | 77 | 23,06 | Mild                | Iracema       | 10/23/2020 | 234097 | 99.7 | 4026   | 99.9 | 99.9 | N.9       |
| VC72 | M | 62 | 21,69 | Moderate<br>/severe | Ibirapuera    | 11/12/2020 | 154542 | 80.9 | 3323.6 | 99.9 | 99.6 | B.1       |
| VC75 | M | 67 | 21,78 | Death               | Felícia       | 7/23/2020  | 133418 | 99.4 | 3311.6 | 100  | 99.9 | B.1.1     |
| VC83 | F | 78 | 22,03 | Moderate<br>/severe | Bairro Brasil | 7/23/2020  | 161015 | 95.7 | 2936.3 | 99.9 | 99.7 | B.1       |
| VC87 | F | 88 | 22,11 | Death               | Ayrton Sena   | 8/12/2020  | 195353 | 99.5 | 3329.2 | 99.9 | 99.9 | B.1.1.28  |
| VC91 | M | 84 | 25.59 | Death               | Ibirapuera    | 8/25/2020  | 237911 | 99.8 | 4433.5 | 99.9 | 99.9 | B.1.1.411 |
| VC97 | F | 32 | 22,81 | Recovered           | Boa Vista     | 7/21/2021  | 244890 | 99.7 | 4226.2 | 99.9 | 99.8 | B.1.1.7   |

---

<sup>a</sup> Cycle threshold    <sup>b</sup> Sample collection date

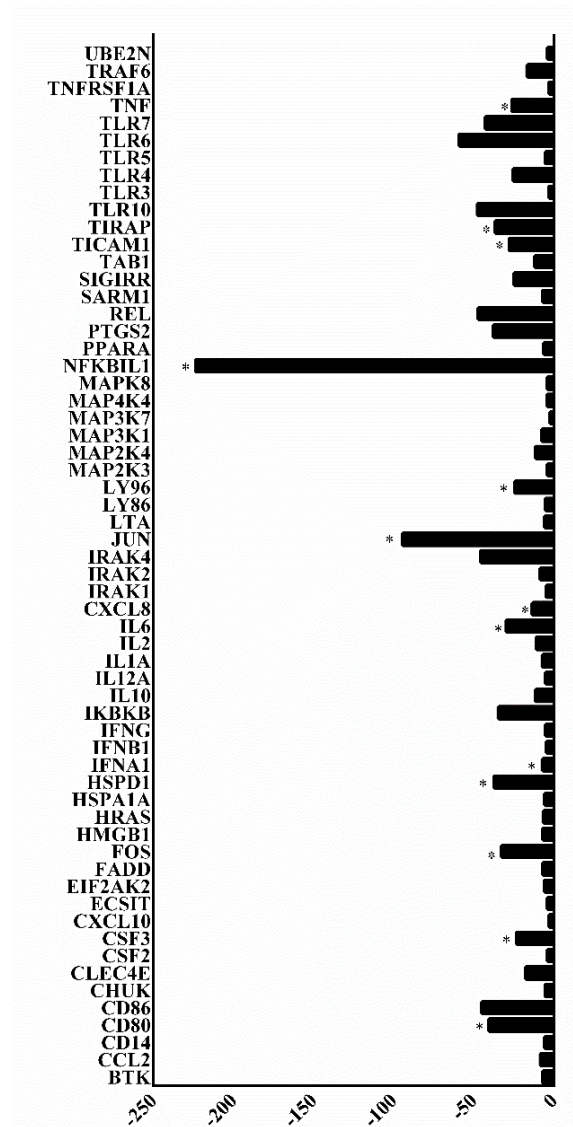

**Figure S1.** Gene expression between asymptomatic group vs death. Upregulation (gray) and downregulation (black) of genes linked to immune response activation pathways. Statistical significance ( $p < 0.05$ ) represented by an asterisk (\*) (nonparametric Mann-Whitney-One-tailed test, GraphPad Prism® version 6.01).

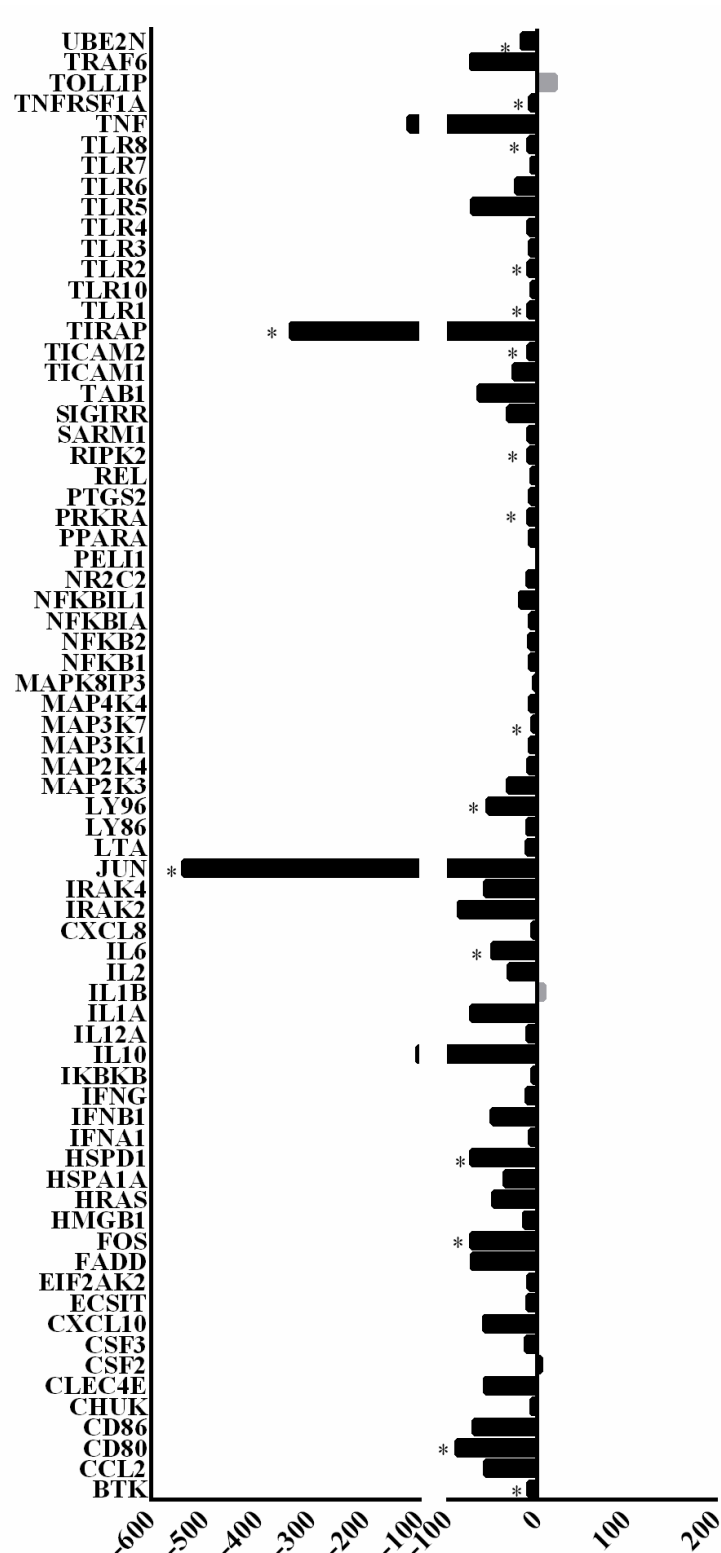

**Figure S2.** Gene expression between the asymptomatic vs mild groups. Upregulation (gray) and downregulation (black) of genes linked to immune response activation pathways. Statistical significance ( $p < 0.05$ ) represented by an asterisk (\*) (nonparametric Mann-Whitney-One-tailed test, GraphPad Prism<sup>®</sup> version 6.01).

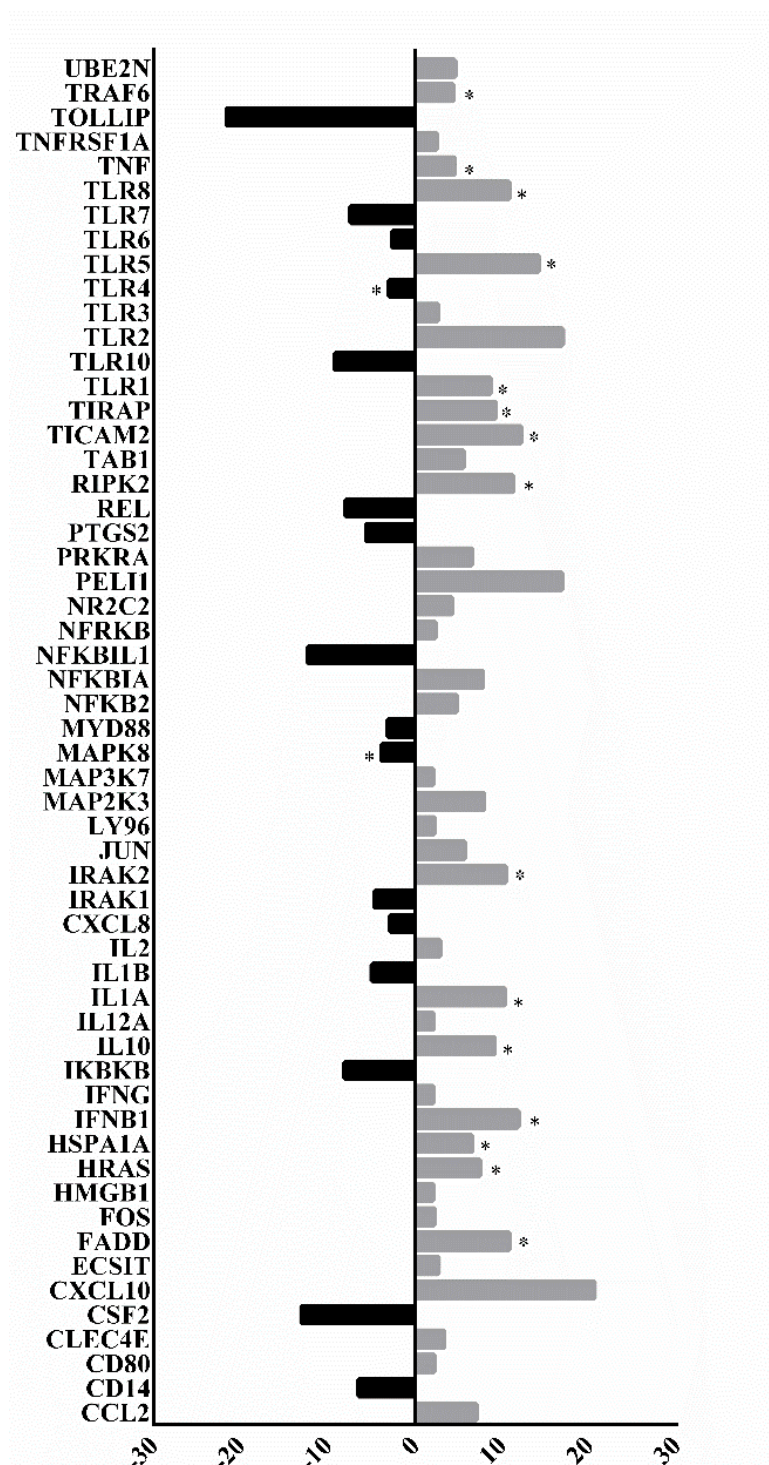

**Figure S3.** Gene expression between the mild group vs death. Upregulation (gray) and downregulation (black) of genes linked to immune response activation pathways. Statistical significance ( $p < 0.05$ ) represented by an asterisk (\*) (nonparametric Mann-Whitney-One-tailed test, GraphPad Prism® version 6.01).

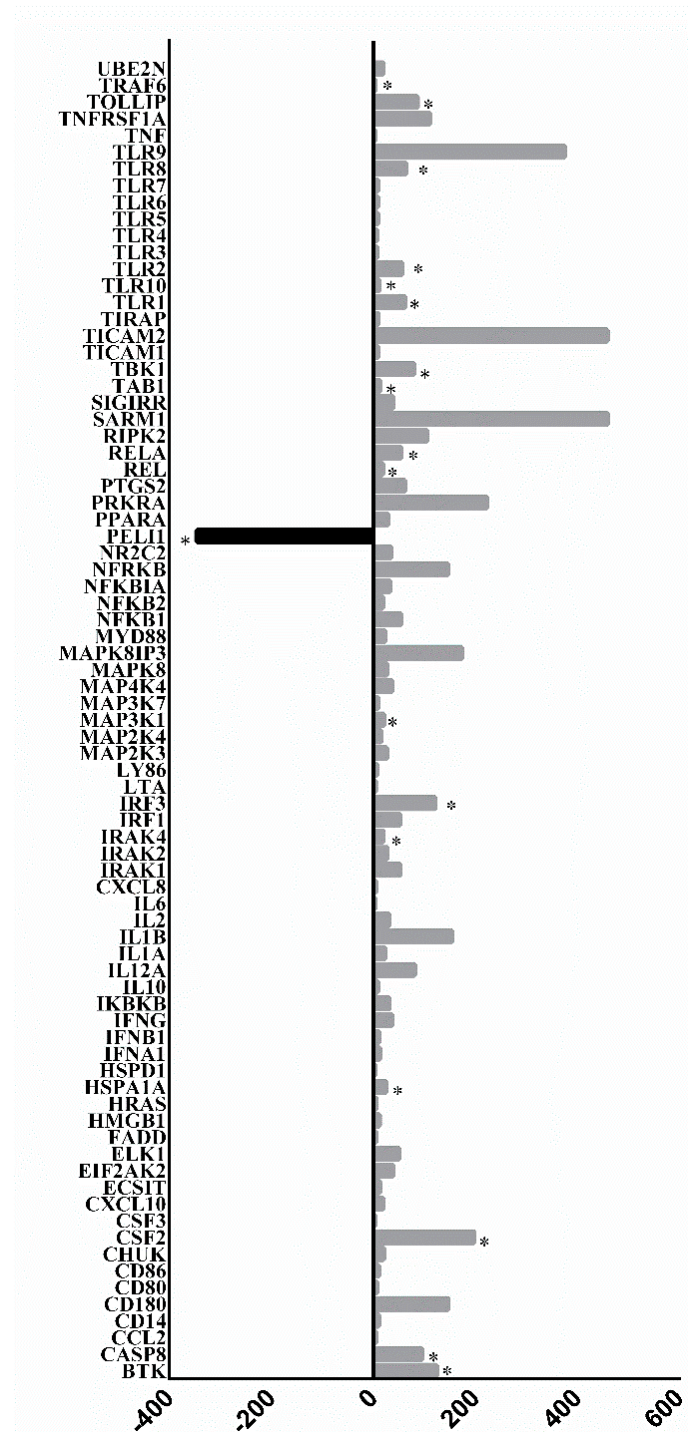

**Figure S4.** Gene expression between the moderate/severe vs asymptomatic groups. Upregulation (gray) and downregulation (black) of genes linked to immune response activation pathways. Statistical significance ( $p < 0.05$ ) represented by an asterisk (\*) (nonparametric Mann-Whitney-One-tailed test, GraphPad Prism® version 6.01).



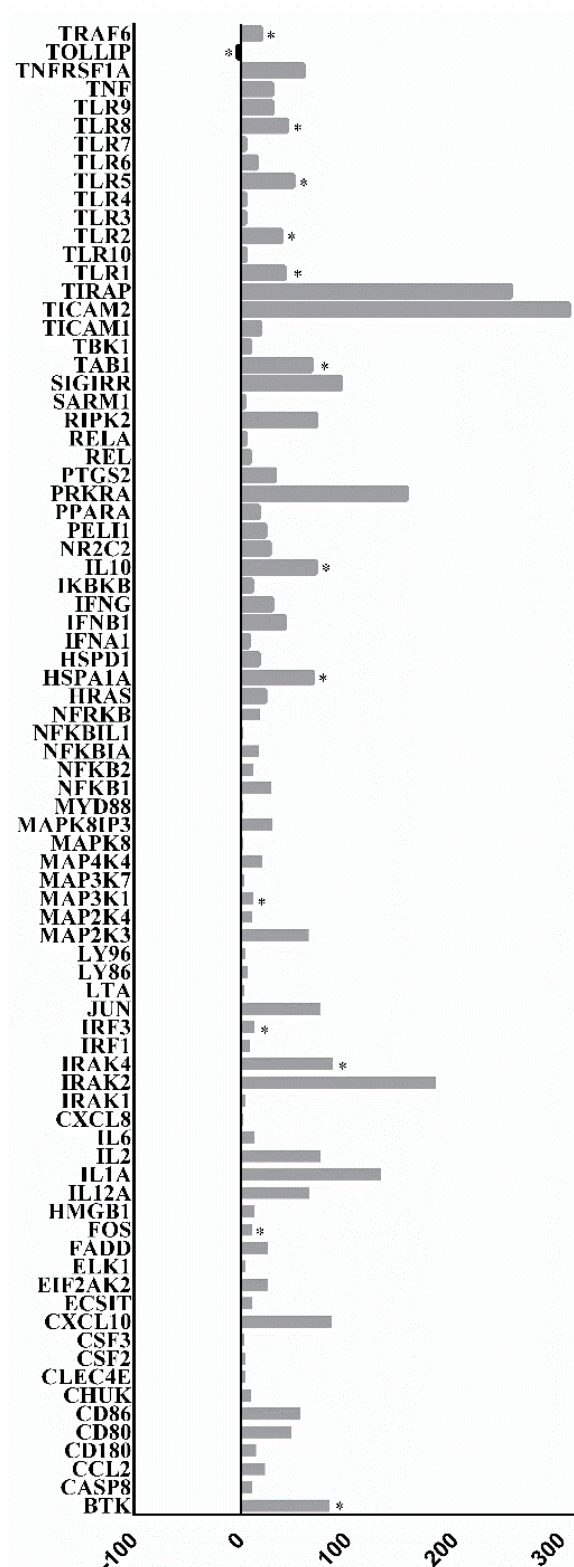

**Figure S5.** Gene expression between the moderate/severe vs mild groups. Upregulation (gray) and downregulation (black) of genes linked to immune response activation pathways. Statistical significance ( $p < 0.05$ ) represented by an asterisk (\*) (nonparametric Mann-Whitney-One-tailed test, GraphPad Prism® version 6.01).



### **Availability of data and materials**

The DNA sequences generated and/or analysed during the current study are available in the GISAID EpiCoV repository (<https://www.gisaid.org/>) , Accession: EPI\_ISL\_13838063, EPI\_ISL\_13838064, EPI\_ISL\_13838065, EPI\_ISL\_13838066, EPI\_ISL\_13838067, EPI\_ISL\_13838024, EPI\_ISL\_13838068, EPI\_ISL\_13838025, EPI\_ISL\_13838069, EPI\_ISL\_13838026, EPI\_ISL\_13838027, EPI\_ISL\_13838028, EPI\_ISL\_13838029, EPI\_ISL\_13838060, EPI\_ISL\_13838061, EPI\_ISL\_13838062, EPI\_ISL\_13838052, EPI\_ISL\_13838053, EPI\_ISL\_13838054, EPI\_ISL\_13838055, EPI\_ISL\_13838056, EPI\_ISL\_13838057, EPI\_ISL\_13838058, EPI\_ISL\_13838059, EPI\_ISL\_13838090, EPI\_ISL\_13838091, EPI\_ISL\_13838092, EPI\_ISL\_13838093, EPI\_ISL\_13838050, EPI\_ISL\_13838094, EPI\_ISL\_13838051, EPI\_ISL\_13838041, EPI\_ISL\_13838085, EPI\_ISL\_13838042, EPI\_ISL\_13838086, EPI\_ISL\_13838043, EPI\_ISL\_13838087, EPI\_ISL\_13838044, EPI\_ISL\_13838088, EPI\_ISL\_13838045, EPI\_ISL\_13838089, EPI\_ISL\_13838046, EPI\_ISL\_13838047, EPI\_ISL\_13838048, EPI\_ISL\_13838049, EPI\_ISL\_13838080, EPI\_ISL\_13838081, EPI\_ISL\_13838082, EPI\_ISL\_13838083, EPI\_ISL\_13838040, EPI\_ISL\_13838084, EPI\_ISL\_13838030, EPI\_ISL\_13838074, EPI\_ISL\_13838031, EPI\_ISL\_13838075, EPI\_ISL\_13838032, EPI\_ISL\_13838076, EPI\_ISL\_13838033, EPI\_ISL\_13838077, EPI\_ISL\_13838034, EPI\_ISL\_13838078, EPI\_ISL\_13838035, EPI\_ISL\_13838079, EPI\_ISL\_13838036, EPI\_ISL\_13838037, EPI\_ISL\_13838038, EPI\_ISL\_13838039, EPI\_ISL\_13838070, EPI\_ISL\_13838071, EPI\_ISL\_13838072 and EPI\_ISL\_13838073). The others datasets generated and/or analyzed during the current study are available from the corresponding author on reasonable request.

## **List of abbreviations**

ACTB: Actin, beta; AGA: Annotated Genome Aligner; B2M: Beta-2-microglobulin; BTK: Bruton agammaglobulinemia tyrosine kinase; CASP8: Caspase 8, apoptosis-related cysteine peptidase; CCL2: Chemokine (C-C motif) ligand 2; CD14: CD14 molecule; CD180: CD180 molecule; CD80: CD80 molecule; CD86: CD86 molecule; CDC: Centers for Disease Control and Prevention; CEPISH: Human Research Ethics Committee; CHUK: Conserved helix-loop-helix ubiquitous kinase; CLEC4E: C-type lectin domain family 4, member E; COPD: Chronic Obstructive Pulmonary Disease; COVID-19: Coronavirus Disease-2019; CSF2: Colony stimulating factor 2 (granulocyte-macrophage); CSF3: Colony stimulating factor 3 (granulocyte); Ct: Cycle Threshold; CXCL10: Chemokine (C-X-C motif) ligand 10; ECSIT: ECSIT homolog (Drosophila); EIF2AK2: Eukaryotic translation initiation factor 2-alpha kinase 2; ELK1: ELK1, member of ETS oncogene family; FADD: Fas (TNFRSF6)-associated via death domain; FOS: FBJ murine osteosarcoma viral oncogene homolog; GAPDH: Glyceraldehyde-3-phosphate dehydrogenase; GTR: General Time Reversible; HGDC: Human Genomic DNA Contamination; HMGB1: High mobility group box 1; HPRT1: Hypoxanthine phosphoribosyltransferase 1; HRAS: V-Ha-ras Harvey rat sarcoma viral oncogene homolog; HSPA1A: Heat shock 70kDa protein 1A; HSPD1: Heat shock 60kDa protein 1 (chaperonin); IBGE: Brazilian Institute of Geography and Statistics; ICU: Intensive Care Unit; IFNA1: Interferon, alpha 1; IFNB1: Interferon, beta 1, fibroblast; IFNG: Interferon, gamma; IKBKB: Inhibitor of kappa light polypeptide gene enhancer in B-cells, kinase beta; IL10: Interleukin 10; IL12A: Interleukin 12A (natural killer cell stimulatory factor 1, cytotoxic lymphocyte maturation factor 1, p35); IL1A:

Interleukin 1, alpha; IL1B: Interleukin 1, beta; IL2: Interleukin 2; IL6: Interleukin 6 (interferon, beta 2); IL8: Interleukin 8; IRAK1: Interleukin-1 receptor-associated kinase 1; IRAK2: Interleukin-1 receptor-associated kinase 2; IRAK4: Interleukin-1 receptor-associated kinase 4; IRF1: Interferon regulatory factor 1; IRF3: Interferon regulatory factor 3; JUN: Jun proto-oncogene; LACEN: Central Laboratory ; LTA: Lymphotoxin alpha (TNF superfamily, member 1); LY86: Lymphocyte antigen 86; LY96: Lymphocyte antigen 96; MAP2K3: Mitogen-activated protein kinase kinase 3; MAP2K4: Mitogen-activated protein kinase kinase 4; MAP3K1: Mitogen-activated protein kinase kinase kinase 1; MAP3K7: Mitogen-activated protein kinase kinase kinase 7; MAP4K4: Mitogen-activated protein kinase kinase kinase 4; MAPK8: Mitogen-activated protein kinase 8; MAPK8IP3: Mitogen-activated protein kinase 8 interacting protein 3; ML: Maximum Likelihood; MYD88: Myeloid differentiation primary response gene (88); NFKB1: Nuclear factor of kappa light polypeptide gene enhancer in B-cells 1; NFKB2: Nuclear factor of kappa light polypeptide gene enhancer in B-cells 2 (p49/p100); NFKBIA: Nuclear factor of kappa light polypeptide gene enhancer in B-cells inhibitor, alpha; NFKBIL1: Nuclear factor of kappa light polypeptide gene enhancer in B-cells inhibitor like 1; NFRKB: Nuclear factor related to kappaB binding protein; NR2C2: Nuclear receptor subfamily 2, group C, member 2; PANGOLIN: Phylogenetic Assignment of Named Global Outbreak LINEages; PELI1: Pellino homolog 1 (Drosophila); PPARA: Peroxisome proliferator-activated receptor alpha; PPC: Positive PCR Control; PRKRA: Protein kinase, interferon-inducible double stranded RNA dependent activator; PTGS2: Prostaglandin-endoperoxide synthase 2 (prostaglandin G/H synthase and cyclooxygenase); REL: V-rel reticuloendotheliosis viral oncogene homolog (avian); RELA: V-rel reticuloendotheliosis viral oncogene homolog A (avian); RIPK2: Receptor-interacting serine-threonine kinase 2; RPLP0: Ribosomal protein, large, P0; RTC: Reverse

Transcription Control; RT-qPCR: Reverse Transcriptase Quantitative Polymerase Chain Reaction; SARM1: Sterile alpha and TIR motif containing 1; SARS-CoV-2: Severe Acute Respiratory Syndrome Coronavirus-2; SH-aLRT: Shimodaira–Hasegawa-like procedure; SIGIRR: Single immunoglobulin and toll-interleukin 1 receptor (TIR) domain; TAB1: TGF-beta activated kinase 1/MAP3K7 binding protein 1; TBK1: TANK-binding kinase 1; TICAM1: Toll-like receptor adaptor molecule 1; TICAM2: Toll-like receptor adaptor molecule 2; TIRAP: Toll-interleukin 1 receptor (TIR) domain containing adaptor protein; TLR1: Toll-like receptor 1; TLR10: Toll-like receptor 10; TLR2: Toll-like receptor 2; TLR3: Toll-like receptor 3; TLR4: Toll-like receptor 4; TLR5: Toll-like receptor 5; TLR6: Toll-like receptor 6; TLR7: Toll-like receptor 7; TLR8: Toll-like receptor 8; TLR9: Toll-like receptor 9; TNF: Tumor necrosis factor; TNFRSF1A: Tumor necrosis factor receptor superfamily, member 1A; TOLLIP: Toll interacting protein; TRAF6: TNF receptor-associated factor 6; UBE2N: Ubiquitin-conjugating enzyme E2N; WHO: World Health Organization;
